1 **Novel *exc* Genes Involved in Formation of the Tubular Excretory**  
2 **Canals of *C. elegans***

3

4 Hikmat Al-Hashimi\*, Travis Chiarelli\*,<sup>1</sup>, Erik A. Lundquist\*, and Matthew Buechner\*

5 \*Dept. of Molecular Biosciences, University of Kansas, Lawrence, KS, 66045, USA

6

7 <sup>1</sup>Present address: Dept. of Biological Sciences, University of Idaho, Moscow, ID, 83843, USA

8

9

10 **Short Title:**

11 RNAi Screen for Tubulogenesis Genes

12

13 **Keywords**

14 Tubulogenesis; lumen formation; endosomes; EXC-5; Charcot-Marie-Tooth Syndrome

15 Type 4H

16

17 Corresponding Author:

18 Matthew Buechner

19 Dept. of Molecular Biosciences

20 1200 Sunnyside Avenue, 8035 Haworth Hall

21 University of Kansas

22 Lawrence, KS, 66045-7534

23 [buechner@ku.edu](mailto:buechner@ku.edu)

24 (785) 864-4328

25

26

## ABSTRACT

27           Regulation of luminal diameter is critical to the function of small single-celled tubes, of  
28 which the seamless tubular excretory canals of *C. elegans* provide a tractable genetic model.  
29 Mutations in several sets of genes exhibit the Exc phenotype, in which canal luminal growth is  
30 visibly altered. Here, a focused reverse genomic screen of genes highly expressed in the canals  
31 found 24 genes that significantly affect luminal outgrowth or diameter. These genes encode  
32 novel proteins as well as highly conserved proteins involved in processes including gene  
33 expression, cytoskeletal regulation, vesicular movement, and transmembrane transport. In  
34 addition, two genes act as suppressors on a pathway of conserved genes whose products mediate  
35 vesicle movement from early to recycling endosomes. The results provide new tools for  
36 understanding the integration of cytoplasmic structure and physiology in forming and  
37 maintaining the narrow diameter of single-cell tubules.

38

39

## INTRODUCTION

40 Tubule formation is an essential process during development of multicellular organisms,  
41 with the narrowest tubes occurring in structures as diverse as *Drosophila* trachea, floral pollen  
42 tubes, and mammalian capillaries (LUBARSKY and KRASNOW 2003; SIGURBJÖRNSDÓTTIR *et al.*  
43 2014). In *C. elegans*, the excretory system is comprised of cells that form single-celled tubules  
44 of three types: pore cells that wrap around a lumen to form a tube with an autocellular junction  
45 (“seamed tube”); a larger duct cell that forms a similar tube followed by dissolution of the  
46 junction to form a “seamless” tube; and the large excretory canal cell that extends four long  
47 seamless tubules (“canals”) throughout the length of the organism (SUNDARAM and BUECHNER  
48 2016).

49 Many mutants have been discovered that affect the length, guidance of outgrowth, or  
50 lumen diameter of the excretory canals. An initial set of such identified “*exc*” mutants were  
51 mapped (BUECHNER *et al.* 1999), and found to include multiple alleles of some *exc* genes, but  
52 only single alleles of others. The frequency of mutations suggested that additional genes should  
53 have excretory lumen defects. Studies by multiple laboratories indeed found alleles of other  
54 genes with *Exc* phenotypes (KHAN *et al.* 2013; KOLOTUEV *et al.* 2013; ARMENTI *et al.* 2014;  
55 LANT *et al.* 2015; GILL *et al.* 2016; FORMAN-RUBINSKY *et al.* 2017). Almost all of the original  
56 *exc* genes have now been cloned (SUZUKI *et al.* 2001; BERRY *et al.* 2003; FUJITA *et al.* 2003;  
57 PRAITIS *et al.* 2005; TONG and BUECHNER 2008; MATTINGLY and BUECHNER 2011; SHAYE and  
58 GREENWALD 2015; GRUSSENDORF *et al.* 2016; AL-HASHIMI *et al.* 2018), and found to affect  
59 multiple well-conserved cell processes, including cytoskeletal structures, ion channels, and  
60 vesicle recycling pathways. The initial screen sought primarily non-lethal genetic effects, but  
61 several of the subsequently identified genes were lethal when null.

62 RNAi studies have been particularly useful in determining roles of excretory canal genes  
63 where the null allele is lethal, such as the gene encoding the NHR-31 nuclear hormone receptor  
64 (HAHN-WINDGASSEN and VAN GILST 2009), the ABI-1 Abelson-Interactor (MCSHEA *et al.*  
65 2013), and the PROS-1 transcription factor (KOLOTUEV *et al.* 2013). In addition, null mutations  
66 in genes that connect the excretory canal cell to the excretory duct (e.g. LET-4 (MANCUSO *et al.*  
67 2012) and LPR-1 (FORMAN-RUBINSKY *et al.* 2017)) are lethal.

68 In order to identify other genes affecting the process of tubulogenesis and tubule  
69 maintenance in the excretory canals, we undertook a targeted genomic RNAi screen to identify  
70 excretory canal genes that exhibit lumen alterations (“Exc” phenotypes) when knocked down.  
71 This screen confirmed or identified 24 genes preferentially expressed in the canals that showed  
72 effects on lumen and/or outgrowth of the excretory canals, including 17 genes with no prior  
73 known phenotypic effects on the canals. In addition, two knockdowns suppressed effects of  
74 mutation of the *exc-5* vesicle-recycling gene, and therefore represent potential regulators of  
75 vesicle transport needed for single-cell tubulogenesis.

76

77

## MATERIALS AND METHODS

### 78 **Nematode genetics:**

79 *C. elegans* strains (Table 1) were grown by use of standard culture techniques on lawns  
80 of *Escherichia coli* strain BK16 (a streptomycin-resistant derivative of strain OP50) on nematode  
81 growth medium (NGM) plates (SULSTON and HODGKIN 1988). All strains were grown and  
82 evaluated for canal phenotypes at 20°C. Worms observed in this study were young adults or  
83 adults.

84 Each nematode strain (wild-type N2, and *exc-2*, *exc-3*, *exc-4*, *exc-5*, and *exc-7*) was  
85 crossed to strain BK36, which harbors a chromosomal insertion of a canal-specific promoter  
86 driving cytoplasmic GFP expression ( $P_{vha-1}::gfp$ ). Strains were then sensitized for RNAi  
87 treatment by crossing them to mutant strain BK540 (a strain carrying *rrf-3(pk1426)* in addition to  
88 the same chromosomal *gfp* insertion as above) and selecting in the F2 generation for  
89 homozygous *rrf-3* deletion allele and appropriate *exc* mutation. (As *exc-7* maps very close to *rrf-*  
90 *3*, the *exc-7* strain carrying *gfp* was not crossed to BK540 and was not sensitized to RNAi). For  
91 all sensitized strains, the *rrf-3* deletion was confirmed via PCR using the forward primer  
92 5'TGCTTTGGATATTGCCGAGCAC<sup>3'</sup>, reverse primer 5'GGAGATCTCCGAGCCCTAGAC<sup>3'</sup>,  
93 and a reverse nested primer 5'CATCGCCAGGCCAACTCAATAC<sup>3'</sup>. As a negative control, we  
94 crossed BK36 to RNAi-refractive strain NL3321 *sid-1(pk3321)*.

### 95 **RNAi Screen:**

96 The Ahringer RNAi bacterial library (KAMATH *et al.* 2003) was utilized for this study.  
97 Overnight cultures were prepared by inoculating bacteria in 5 ml LB + ampicillin (100µg/ml) +  
98 tetracycline (12.5µg/ml), and cultured at 37°C for 16 hours. In order to induce the bacteria with  
99 IPTG, overnight cultures were moved to fresh media, incubated at 37°C with rotation until  
100 cultures reached an O.D.<sub>600</sub> in a range from 0.5 to 0.8. IPTG was then added to the culture to a

101 final concentration of 95 µg/ml along with ampicillin at 100µg/ml. The cultures were then  
102 incubated with rotation at 37°C for ninety minutes followed by re-induction with IPTG and  
103 ampicillin, and another ninety minutes of incubation at 37°C with rotation. Finally, IPTG and  
104 ampicillin were added for the last time right before using these bacteria to seed NGM in 12-well  
105 plates and Petri dishes. Plates were then incubated at room temperature for 24 hours in order to  
106 dry. L2 worms were added to the plates, and their F1 progeny were evaluated for phenotypes in  
107 the excretory canals. Each set of genes tested was induced together with induction of the *sid-1*  
108 negative control strain BK541 and of two positive control strains: a plate of bacteria induced to  
109 knock down *dpy-11* (which affects the hypoderm but not the canals) (BRENNER 1974), and a  
110 plate of bacteria induced to knock down *erm-1* bacteria, which causes severe defects in excretory  
111 canal length and lumen diameter (KHAN *et al.* 2013), respectively. Induction was considered  
112 successful and plates were screened only if worms grown on the control plates showed the  
113 appropriate phenotypes in at least 80% of the surviving progeny.

114 For each tested gene, the induced bacteria were seeded on one 12-well plate and one  
115 60mm plate. Two or three L2 nematodes were placed on the bacterial lawn of each well, and  
116 screened for phenotypes in the 4<sup>th</sup>, 5<sup>th</sup>, and 6<sup>th</sup> days of induction. Each gene was tested via RNAi  
117 treatment of twelve different strains of worms, shown in Table 1, while the sole 60mm plate was  
118 used for further analysis of animals with wild-type canals (strain BK540, Table 1) grown on the  
119 RNAi-expressing bacteria. For assessment of a canal effect, a minimum of five animals showing  
120 a canal phenotype were collected, examined, and in most cases photographed; for most genes,  
121 10-20 affected animals were examined closely. For the 24 genes showing effects, the entire  
122 experiment was subsequently repeated, with induction and growth of bacteria solely on 60mm  
123 plates and feeding tested on BK540 (RNAi-sensitized wild-type with integrated canal marker)  
124 worms.

125 **Microscopy:**

126 Living worms were mounted on 3% agarose pads to which were added 0.1 $\mu$ m-diameter  
127 Polybead® polystyrene beads (Polysciences, Warrington, PA) to immobilize the animals (KIM *et*  
128 *al.* 2013). Images were captured with a MagnaFire Camera (Optronics) on a Zeiss Axioskop  
129 microscope equipped with Nomarski optics and fluorescence set to 488 nm excitation and 520  
130 nm emission. Adobe Photoshop software was used to combine images from multiple sections of  
131 individual worms and to crop them. Contrast on images was uniformly increased to show the  
132 excretory canal tissue more clearly.

### 133 **Canal Measurements:**

134 For measuring effects of suppression of the Exc-5 phenotype, excretory canal length and  
135 cystic and suppression phenotypes were measured and analyzed as described (TONG and  
136 BUECHNER 2008). Canal length was scored by eye on a scale from 0-4: A score of (4) was  
137 given if the canals had grown out to full length; canals that extended halfway past the vulva  
138 (midbody) to full-length were scored as (3); at the vulva (2); canals that ended halfway between  
139 the cell body and the vulva were scored as (1); and if the canal did not extend past the cell body,  
140 the canal was scored as (0). For statistical analyses, canals were binned into three categories for  
141 length (scores 0-1, scores 1.5-3.0, and score 3.5-4), and the results then analyzed via a 3x2  
142 Fisher's Exact Test ([www.vassarstats.net](http://www.vassarstats.net)).

### 143 **Reagent and Data Availability:**

144 All nematode strains used in this study are listed in Table 1. Bacterial clone numbers  
145 tested, and summary of test results are presented in Tables S1 and S2, available on Figshare.  
146 Gene names *exc-10* through *exc-18* and *suex-1* and *suex-2* have been registered with Wormbase  
147 ([www.wormbase.org](http://www.wormbase.org)). Sensitized *exc* mutant strains are available upon request, and may be  
148 made available through the Caenorhabditis Genetics Center (CGC), University of Minnesota  
149 ([cgc.umn.edu](http://cgc.umn.edu)), pending acceptance to that repository. Other strains are available upon request.

150



151

152

## RESULTS AND DISCUSSION

### 153 **A focused RNAi screen for new *exc* mutations**

154 A study of genomic expression in *C. elegans* was previously undertaken by the Miller lab  
155 (SPENCER *et al.* 2011). In that study, lists of genes highly expressed in various tissues, including  
156 250 genes preferentially expressed in the excretory canal cell, were made public on the website  
157 WormViz (<http://www.vanderbilt.edu/wormdoc/wormmap/WormViz.html>). Of the  
158 corresponding strains in the Ahringer library of bacteria expressing dsRNA to specific *C. elegans*  
159 genes (KAMATH *et al.* 2003), we found that 216 grew well, and were tested for effects on the  
160 various *C. elegans* strains (Table S1).

161 The excretory canal cell has some characteristics similar to those of neurons: long  
162 processes guided by netrins and other neural guidance cues (HEDGECOCK *et al.* 1987), as well as  
163 early expression of the gene EXC-7/HuR/ELAV (FUJITA *et al.* 2003), and so was considered  
164 potentially refractory to feeding RNAi (CALIXTO *et al.* 2010). We crossed strain BK36,  
165 containing a strong canal-specific integrated *gfp* marker, to a mutant in the *rrf-3* gene (*pk1426*) in  
166 order to increase sensitivity to RNAi (SIMMER *et al.* 2002) to create strain BK540. In addition,  
167 we also crossed the same *gfp* marker and *rrf-3* mutation to excretory canal mutants *exc-2*, *exc-3*,  
168 *exc-4*, *exc-5*, and *exc-7* (except that *exc-7* was not RNAi-sensitized; see Materials and Methods).  
169 This was done in order to determine if the tested gene knockdowns interacted with known *exc*  
170 genes affecting excretory canal tubulogenesis, since double mutants in some *exc* genes (e.g. *exc-*  
171 *3*; *exc-7* double mutants (BUECHNER *et al.* 1999)) exhibit more severe canal phenotypes than  
172 either mutant alone.

173 We demonstrated the effectiveness of the treatment by performing successful

174 knockdowns of canal-specific and –non-specific genes in these strains. Control knockdowns of  
175 *dpy-11* resulted in short worms with normal canal phenotypes, while knockdown of *exc-1* caused  
176 formation of variable-sized cysts in a shortened excretory canal, with no other obvious  
177 phenotypes (Fig. 1). Here, knockdown of the ezrin-moesin-radixin homologue gene *erm-1*  
178 (GÖBEL *et al.* 2004; KHAN *et al.* 2013) caused severe malformation of the canals visible in 80%  
179 of surviving treated worms. A deletion mutant of this gene is often lethal due to cystic  
180 malformation of the intestine as well as the canals (GÖBEL *et al.* 2004), while our treatment  
181 allowed many animals to survive to adulthood and reproduce. This result is consistent with our  
182 RNAi treatment causing variable levels of gene knockdown (TIMMONS AND FIRE 1998) in the  
183 excretory canals.

184         Of the 212 non-control genes tested, 182 caused no obvious phenotypic changes to the  
185 canals of BK540 worms, and 4 gave very low numbers (less than 5) of animals with mild  
186 defects. Knockdown of 24 genes caused noticeable defects in the development of the excretory  
187 canals in at least 5-10 worms, and gave this result upon retesting of these strains (Table 2, Table  
188 S2). The length of the canals was rated according to a measure shown in Fig. 1A, in which no  
189 extension past the excretory cell body was rated 0, extension to the animal midbody marked by  
190 the position of the vulva was measured as 2, and full extension was rated as 4. The average  
191 canal length of affected animals was characteristic for the gene knocked down (Table 2),  
192 although RNAi knockdown via feeding is intrinsically variable in the strength of gene induction  
193 and amount of bacteria eaten, so the observed canal length is likely longer than if the gene were  
194 fully and uniformly knocked out. Diameter of the canals also varied greatly, depending on the  
195 gene knocked down; in cases where fluid-filled cysts became evident (as in previously-described  
196 *exc* mutants), cyst size was rated as large (cyst diameter at least half the width of the animal),  
197 medium (one-quarter to one-half animal width), or small (up to one-quarter animal width).

198 Finally, use of feeding RNAi knockdown allowed observation of gene effects where knockouts  
199 have been reported to be lethal.

## 200 **Excretory Canal Phenotypes**

201 The common feature of all of these knockdown animals is that the posterior canals did  
202 not extend fully to the back of the animal (Table 2). The length of the canal lumen was often the  
203 same as the length of the canal cytoplasm, but in many cases the visible lumen (seen as a dark  
204 area in the center of the GFP-labelled cytoplasm) was substantially shorter than the length of the  
205 canal cytoplasm.

206 In addition to effects on canal length, the shape and width of the canal lumen and/or canal  
207 cytoplasm was affected by specific gene knockdown: A) Several knockdowns resulted in the  
208 formation of fluid-filled cysts reminiscent of those in known *exc* mutants; B) Canals appeared  
209 normal in diameter, but had frequent thickenings of cytoplasm around otherwise normal (but  
210 short) lumen similar to the ‘beads’ or ‘pearls’ seen in growing first-larval-stage canals or in  
211 canals of animals undergoing osmotic stress (KOLOTUEV *et al.* 2013); C) Canal lumen ending in  
212 a large swelling of convoluted tubule or a multitude of small vesicles, and often with a ‘tail’ of  
213 very thin canal cytoplasm without any lumen continuing distally; D) a series of vesicles filling  
214 much of the cytoplasm outside the normal-diameter lumen, and; E) an irregular shape of the  
215 basal surface of the cytoplasm, varying widely in diameter. Each of these phenotypes will be  
216 discussed below, together with the genes whose knockdown resulted in that phenotype.

217 **CYSTIC CANALS:** Two gene knockdowns, of *ceh-6* and of T25C8.1 (which will be  
218 referred to as *exc-10*) resulted in the formation of large fluid-filled cysts (Fig. 2), similar to those  
219 seen in *exc-2*, *exc-4*, and *exc-9* mutants (encoding an intermediate filament, a CLC chloride  
220 channel, and a CRIP vesicle-trafficking protein, respectively (TONG and BUECHNER 2008;

221 BERRY *et al.* 2003, Al-Hashimi, in press). The homeobox gene *ceh-6* encodes a well-studied  
222 transcription factor that defines expression of many genes in the canal (BURGLIN and RUVKUN  
223 2001; ARMSTRONG and CHAMBERLIN 2010). Null mutants of this gene are lethal. The  
224 knockdowns had very short canals with large fluid-filled cysts. The effect of *ceh-6* knockdown  
225 could reflect lower transcription of many of the known *exc* genes, effects on the excretory  
226 aquaporin *aqp-8* (MAH *et al.* 2007), or of a novel gene.

227 The second gene, T25C8.1 (*exc-10*) encodes a carbohydrate kinase (homology to  
228 sedoheptulose kinase) of unknown function in nematodes, although the human homologue SHPK  
229 has been linked to a lysosomal storage disease (PHORNPHUTKUL *et al.* 2001; WAMELINK *et al.*  
230 2008).

231 Knockdowns in *mop-25.2*, *egal-1*, F41E7.1 (*exc-11*), and T05D4.3 (*exc-12*) exhibited  
232 small-to-medium sized cysts (Fig. 2). In these animals, cystic regions of the lumen often appear  
233 to contain a series of hollow spheres, which may be connected or separate from each other along  
234 the lumen length (Fig. 2C-F). The EGAL-1 protein is a homologue of the *Drosophila*  
235 Egalitarian exonuclease involved in RNA degradation. EGAL-1 also interacts with dynein as  
236 part of a dynein-regulating complex at the face of the nucleus (FRIDOLFSSON *et al.* 2010) and  
237 regulates polarity of the *Drosophila* egg chamber through organization of oocyte microtubules  
238 (SANGHAVI *et al.* 2016). The excretory canal cell is rich in microtubules along the length of the  
239 canals (BUECHNER *et al.* 1999; SHAYE and GREENWALD 2015).

240 MOP-25.2 is a protein with close homology to yeast Mo25 and its homologues in all  
241 animals, and acts as a scaffolding protein for activating kinases including germinal center kinase  
242 at the STRIPAK complex, which also regulates RAB-11-mediated endocytic recycling in the  
243 excretory canal morphology and gonadal lumen formation in *C. elegans* (LANT *et al.* 2015; PAL

244 *et al.* 2017). The *Drosophila* Mo25 also regulates transepithelial ion flux in the osmoregulatory  
245 Malpighian tubules (SUN *et al.* 2018).

246 F41E7.1 (*exc-11*) encodes a solute carrier with high homology to the Na<sup>+</sup>/H<sup>+</sup> exchanger.  
247 The excretory cell lumen is associated with small canaliculi that have high levels of the vacuolar  
248 ATPase to pump protons into the canal lumen (OKA *et al.* 2001), so the presence of a Na<sup>+</sup>/H<sup>+</sup>  
249 exchanger could be used for canal osmoregulatory function as well as luminal shape.

250 Finally, T05D4.3 (*exc-12*) is homologous only to genes in other nematodes, and has no  
251 obvious function, other than the presence of several putative transmembrane domains.

252 PERIODIC CYTOPLASMIC SWELLINGS: These “beads” or “pearls” are commonly  
253 seen in wild-type animals with growing canals at the L1 stage and in animals under osmotic  
254 stress (KOLOTUEV *et al.* 2013). These sites are hypothesized to be locations of addition of  
255 membrane to allow the canal to continue to grow together with the animal. The knockdown  
256 animals here were measured in young adulthood, and so should not exhibit such beads.  
257 Knockdown of the *inx-12* or *inx-13* genes (Fig. 3), which encode innexins highly expressed in  
258 the canals (and in the adjacent CAN neurons), gave rise to these structures. Innexins form the  
259 gap junctions of invertebrates (HALL 2017), and the excretory canals are rich in these proteins  
260 along the basal surface, where they connect the canal cytoplasm to the overlaying hypodermis  
261 (NELSON *et al.* 1983). Null mutants in either of these two genes results in early larval rod-like  
262 swollen lethality consistent with excretory cell malfunction (ALTUN *et al.* 2009). The  
263 knockdown phenotype here further suggests that these proteins regulate balancing of ionic  
264 content to allow normal canal growth.

265 A similar phenotype is seen in animals knocked down for *ceh-37*, which encodes a well-  
266 conserved Otx Homeobox protein expressed solely in the excretory cell in adults, but

267 additionally in a wide range of tissues in embryos (LANJUN *et al.* 2003; HENCH *et al.* 2015), and  
268 which binds preferentially to telomeric DNA (MOON *et al.* 2014). Expression of *ceh-37* is itself  
269 regulated by CEH-6 (BURGLIN and RUVKUN 2001), so the difference in phenotypes of  
270 knockdowns of these two genes suggests that CEH-6 regulates a wider range of genes than does  
271 CEH-37.

272 Knockdown of *dhhc-2* shows a similar phenotype, although bead size and placement  
273 appears more irregular than for the above knockdowns (Fig. 3). Close examination of the beads  
274 shows numerous small dark spots consistent with the presence of many vesicles of varying sizes  
275 within the beads (Fig. 3D) This gene encodes a zinc-finger protein homologous orthologous to  
276 human ZDHHC18, which acts as a protein palmitoyltransferase, possibly for small GTPase  
277 proteins (OHNO *et al.* 2012). A previous knockdown study of this gene (EDMONDS AND MORGAN  
278 2014) showed no obvious effects on morphology or behaviour, although combined knockdown  
279 of both *dhhc-2* together with its close homologue *dhhc-8* resulted in reduced lifespan for  
280 unknown reasons.

281 Finally, the “bead” phenotype is also seen in knockdown of *mxt-1*, an RNA-binding  
282 protein that binds to eukaryotic initiation factor 4E to regulate translation rates (PETER *et al.*  
283 2015) (Fig. 3E).

284 SWELLING AT END OF LUMEN: The largest group of knockdown animals showed a  
285 substantial swelling at the distal tip of generally normal-diameter canals (Fig. 4). In some cases,  
286 the swelling appears to be caused by accumulation of a convoluted lumen folded back on itself,  
287 while in other knockdowns this swelling could reflect accumulation of a large number of vesicles  
288 at the end of the lumen. A combination of these structures also appears in many animals.  
289 Reflecting the variable effects of RNAi knockdown, some animals knocked down in genes

290 discussed above, *ceh-37* and *mop25.2*, sometimes showed a highly convoluted lumen primarily  
291 at the distal tip (Fig. 4C, 4H), possibly reflecting weaker knockdown than in other examples  
292 where the entire lumen was affected. Knockdown of another gene, *best-3*, showed a similar  
293 effect (Fig. 4G). This gene encodes one of a large family of chloride channels homologous to  
294 human bestrophins, chloride channels found in muscle, neurons, and the eye, that are essential  
295 for Ca<sup>++</sup> signaling, and defective in retinal diseases (STRAUSS *et al.* 2014).

296 Knockdowns of *gst-28* and of *fbxa-183* (Fig. 4A, 4D) show clear and dramatic  
297 accumulation of vesicles at the swelling at the tip of the lumen. Vesicle transport defects are the  
298 cause of canal malformations in *exc-1*, *exc-5*, and *exc-9* mutants (TONG and BUECHNER 2008;  
299 MATTINGLY and BUECHNER 2011; GRUSSENDORF *et al.* 2016), so the knockdown effects shown  
300 in these and the following genes may reflect similar defects in vesicular transport. GST-28 is a  
301 glutathione-S-transferase orthologous to the human prostaglandin D synthase, which isomerizes  
302 PGH<sub>2</sub> to form prostaglandin (CHANG *et al.* 1987). FBXA-183 is one of the very large family of  
303 F-box proteins in *C. elegans* that facilitate targeting substrates for E3 ubiquitinase-mediated  
304 destruction (KIPREOS AND PAGANO 2000). FBXA-183 also contains an FTH (FOG-2 Homology)  
305 domain; in FOG-2, this domain binds GLD-1, an RNA-binding protein (CLIFFORD *et al.* 2000).

306 Knockdown of three genes produced animals with swollen distal canal tips filled with a  
307 mixture of convoluted tubule and individual vesicles. The *gsr-1* gene (Fig. 4B) encodes the sole  
308 glutathione reductase in *C. elegans*, necessary for rapid growth and embryonic development as  
309 well as canal morphology (MORA-LORCA *et al.* 2016). T19D12.9 (to be referred to as *exc-13*)  
310 (Fig. 4E) encodes another homologue of the human SLC family of solute carriers, including the  
311 ubiquitous lysosomal membrane sialic acid transport protein sialin (SLC17A5), which transports  
312 sialic acid from the lysosome, and nitrate from the plasma membrane in humans (QIN *et al.*  
313 2012). C09F12.3 (to be referred to as *exc-18*) encodes a protein found predominantly in

314 nematodes and likely encoding a 7-tm G-Protein-Coupled Receptor of the FMRFamide class,  
315 used to respond to the wide range of FMRFamide-Like Peptides (FLP) mediating multiple  
316 behaviors in invertebrates (PEYMEN *et al.* 2014). Finally, knockdown of the germinal center  
317 kinase gene *gck-3* (Fig. 4I) caused this phenotype. As noted above, germinal center kinase acts  
318 at the STRIPAK complex to regulate maintain canal morphology, and malformations affecting  
319 STRIPAK cause tubule defects such as cavernous cerebral malformations in humans (LANT *et al.*  
320 2015).

321 A very narrow canal “tail” completely lacking a visible lumen often extends substantially  
322 past the end of the lumenated portion of the canal in these animals (Fig. 4B, 4C, 4G, 4I). This  
323 tail follows the path of wild-type canal growth, and in a few rare instances even reaches the  
324 normal endpoint of the canal. In wild-type animals, the lumen and tip of the canal grow together  
325 and reach the same endpoint (BUECHNER *et al.* 1999), with a widening suggestive of a growth  
326 cone at the tip of the growing canal in the embryo and L1 stage (FUJITA *et al.* 2003). The tip of  
327 the canal is enriched in the formin EXC-6, which mediates interactions between microtubules  
328 and actin filaments and may mediate connections between the canal tip and end of the lumen  
329 (SHAYE and GREENWALD 2015). The results here are consistent with the idea that canal lumens  
330 grow and extend separately from the growing basal surface that guides cytoplasmic outgrowth  
331 (KOLOTUEV *et al.* 2013).

332 A NOVEL EXCRETORY PHENOTYPE: VESICLES ALONG LENGTH OF  
333 SWOLLEN CANAL CYTOPLASM: Knockdown of some genes gave rise to a phenotype that  
334 has not, to our knowledge, been observed before within the excretory canals (Fig. 5).  
335 Knockdown of the gene K11D12.9 (which will be referred to as *exc-14*) exhibited an  
336 extraordinary increase of vesicles in the cytoplasm of the canal, terminating in a large irregular  
337 swelling at the end of the canal (Fig. 5A, 5A’). This swelling is unusual in that the lumen of the



338 canal appears relatively normal in diameter (though short), but is surrounded by cytoplasm that  
339 puffs out at the basal side of the cell, which is surrounded by (and extensively connected via  
340 innexins to) the hypoderm and by basement membrane abutting the pseudocoelom (NELSON *et*  
341 *al.* 1983). GFP labelling of the cytoplasm showed the thick layer of canaliculi surrounding the  
342 lumen, which is surrounded by a cytoplasm packed with vesicles of variable size. K11D12.9  
343 encodes a protein containing a RING finger domain at the C-terminus, with BLASTP homology  
344 to potential ubiquitin E3-ligases found in plants and animals.

345 Knockdown of several other genes gave rise to vesicles of varying size in the cytoplasm  
346 plus irregular swellings to the side of the canal, some primarily at the terminus of the lumen, and  
347 in some cases along the length of the canals (Fig. 5B-5F). These included some animals knocked  
348 down in the F-Box gene *fbxa-183*, discussed above. Knockdowns of T08H10.1 (which will be  
349 referred to as *exc-15*) or of H09G03.1 (*exc-16*) showed increasing amounts of variable-sized  
350 vesicles in the canal cytoplasm towards the distal ends of the canals, together with increasing  
351 numbers of irregular cysts in the lumen (Fig. 5C, 5D). H09G03.1 has no conserved domains,  
352 and no clear homology to genes outside the *Caenorhabditis* genus. T08H10.1, however, encodes  
353 a well-conserved aldo-keto-reductase (family 1 member B10), and in a previous RNAi screen  
354 knockdowns of this gene slowed the defecation rate by about 20%, possibly through effects on  
355 mitochondrial stress (LIU *et al.* 2012).

356 Knockdown of two other genes caused the appearance of large cysts or vesicles  
357 appearing on the basal surface of the canals in just a few seemingly random spots along the  
358 length of the canals (Fig. 5E, 5F). C03G6.5 (*exc-17*) encodes another protein found only in  
359 nematodes, with a Domain of Unknown Function (DUF19), possibly an extracellular domain,  
360 found only among several nematode and bacterial proteins. CYK-1, however, is a formin of the  
361 Diaphanous class, that has a well-investigated role in regulating microfilaments in cytokinesis

362 (SEVERSON *et al.* 2002), and in forming normal canal morphology through interactions with the  
363 EXC-6 formin, via regulation by EXC-5 (human FGD) guanine exchange factor and CDC-42  
364 (SHAYE and GREENWALD 2016). Our RNAi knockdown of *cyk-1* produced a stronger phenotype  
365 (shorter canals with large cysts on the basal side) than seen in the temperature-sensitive mutant  
366 used by the Greenwald laboratory, but not as strong an effect as was seen in double mutants of  
367 *cyk-1(ts)* with *exc-6* null mutants (SHAYE and GREENWALD 2016).

### 368 **Variability and Range of Phenotypes:**

369 Treatment of nematodes via feeding RNAi creates variable levels of knockdown between  
370 animals (HULL and TIMMONS 2004). This feature of the gene knockdowns has allowed  
371 observation of effects of genes that have a lethal null phenotype, and show a relationship  
372 between the phenotypes described above, as seen from RNAi-knockdown of the *vha-5* gene.  
373 This gene encodes a protein of the membrane-bound V0 subunit of the vacuolar ATPase, and is  
374 strongly expressed in the canalicular vesicles at the apical membrane of the canals (KOLOTUEV *et*  
375 *al.* 2013). Mutations of this gene are lethal, and a point mutation led to strong whorls of labelled  
376 VHA-5 at the apical surface (LIEGEOIS *et al.* 2006). Our knockdown of this gene gave a wide  
377 range of canal phenotypes in different animals (Fig. 6). Some animals exhibited beads  
378 surrounding a normal-diameter lumen (Fig.6A), similar to animals under slow growth or osmotic  
379 stress, as in Fig. 3. Other animals showed small septate cysts in the canal lumen, but the canal  
380 lumen overall was generally of near-normal diameter, and the basal surface had mostly minor  
381 irregularities (Fig. 6B), similar to animals knocked down for *exc-15* (Fig. 5D). Other *vha-5*  
382 knockdown animals also exhibited a similar luminal phenotype, but also showed large vesicles  
383 within a highly irregularly shaped cytoplasm (Fig. 6C), similar to animals impaired in *exc-17* or  
384 *cyk-1* expression (Fig. 5E, 5F). Finally, the most extremely affected *vha-5* knockdown animals  
385 (Fig. 6D) showed cysts throughout the lumen, a swollen terminus to the lumen, and a range of

386 variable-sized vesicles or cysts that pack the entire swollen cytoplasm of the canals. The wide  
387 range of defects seen in animals knocked down may reflect the very strong phenotype of the null  
388 mutant (embryonic lethal), and the wide range of expression of dsRNA that can occur through  
389 feeding RNAi. The variability of phenotype also indicates that the range of mutant phenotypes  
390 described above for various gene knockdowns may represent variable expression of dsRNAs that  
391 affect a common set of coordinated pathways that function to create and maintain the  
392 complicated shape of the excretory canals; these pathways include gene transcription, ion and  
393 small molecule transport, cell cytoskeleton, cell-cell communication, and movement and  
394 function of vesicles.

### 395 **Other Phenotypes**

396 While the focus of this RNAi screen centered on excretory canal morphology, a few other  
397 phenotypes were noticed, including occasional effects on gonadal shape, fertility, and viability.  
398 In many *exc* mutants, the shape of the hermaphrodite tail spike is affected (BUECHNER *et al.*  
399 1999), and similar strong results were reproducibly observed here for multiple RNAi  
400 knockdowns (Fig. 7). In addition to the knockdowns shown (for genes *exc-11*, *exc-14*, *egal-1*,  
401 *mop-25.2*, and *inx-12*), tail spike defects were also seen in animals knocked down in genes  
402 encoding homeobox protein CEH-6, vacuolar ATPase component VHA-5, sedoheptulose kinase  
403 EXC-10, aldo-keto reductase EXC-15, and innexin INX-13. The tail spike is formed from the  
404 interaction of hypodermal tissue hyp10 with a syncytium of two other hypodermal cells that later  
405 undergo cell death (SULSTON *et al.* 1983); it remains to be determined what features this  
406 structure has in common with the canals that require the same proteins.

### 407 **Suppressors of the Exc-5 Phenotype**

408 Finally, the RNAi screen was also carried out in animals carrying mutations in various

409 *exc* genes, to try to find genes that interacted to form more severe phenotypes. Previous  
410 interactions have found, for example, that *exc-3*; *exc-7* double mutants have a more severe canal  
411 phenotype than does either mutant alone (BUECHNER *et al.* 1999), and similar exacerbation of  
412 effects are seen for *exc-5*; *exc-6* double mutants (LIEGEOIS *et al.* 2006). No such effects were  
413 detected in this screen, but surprisingly, knockdown of two genes caused an unexpected  
414 phenotype: the restoration of near-wild-type phenotype from strongly cystic homozygous *exc-*  
415 *5(rh232)* animals (Fig. 8) carrying a large deletion of almost all of the *exc-5* gene (SUZUKI *et al.*  
416 2001). As noted above, *exc-5* encodes a Guanine Exchange Factor (GEF) specific for CDC-42  
417 (SHAYE and GREENWALD 2016). EXC-5 is homologous to four human FGD proteins, including  
418 two that are implicated in Aarskog-Scott Syndrome (Facio-Genital Dysplasia) and Charcot-  
419 Tooth-Marie Syndrome Type 4H, respectively (GAO *et al.* 2001; DELAGUE *et al.* 2007; HORN *et*  
420 *al.* 2012). The latter disease affects outgrowth of the single-celled tubular Schwann cells during  
421 rapid growth, and identification of mutations in suppressor genes therefore has the potential to  
422 increase understanding of this disease.

423 *exc-5* null mutants are characterized by large fluid-filled cysts at the terminus of both  
424 anterior and posterior canals (Fig. 8). Knockdown RNAi of these suppressor genes, both by  
425 feeding and by direct dsRNA microinjection, yielded a large number of progeny exhibiting near-  
426 normal canal phenotypes, with canal length extending near-full-length (Fig. 8D). We will refer  
427 to this phenotype as Suex, for SUPpressor of EXcretory defects. In SUEX canals, no obvious  
428 septate cysts are evident, although parts of the canal lumen were slightly widened (Fig. 8B, 8C).

429 F12A10.7 (*suex-1*) encodes a small protein (113 amino acids) unique to *C. elegans*,  
430 expressed in the excretory canal cell and in some neural subtypes, with homology to genes in  
431 only a few other *Caenorhabditis* species. The C-terminal half of the protein contains a number  
432 of repeats of tri- and tetra-peptides GGY and GGGY. As the bacterial construct from the

433 Ahringer Library also included a small number of base pairs of the nearby gene F12A10.1, we  
434 confirmed the identity of the suppressing gene through microinjection of synthesized dsRNA  
435 specific to the F12A10.7 transcript into the gonad of the *exc-5* null mutant strain BK545, and  
436 confirmed the appearance of progeny with canals of wild-type length.

437         In contrast to F12A10.7, C53B4.1 (*suex-2*) encodes a protein with homologues in a wide  
438 range of animals, including humans. This gene encodes a cation transporter that has been  
439 implicated in gonadal distal tip cell migration in a previous RNAi screen (CRAM *et al.* 2006).  
440 Multiple strong homologues in humans fall into the SLC (SoLute Carrier) family 22 class of  
441 proteins, with the closest homologue SLC22A1 encoding a 12-tm-domain integral membrane  
442 protein transporting organic cations (NIGAM 2018) and expressed in the human liver and small  
443 intestine. The effect of knocking down this transporter implies that ionic milieu or lipid  
444 composition affects transport of vesicles mediated by EXC-5 signaling, but future work will be  
445 needed to determine the role that this transporter exerts on ionic content, and possibly on  
446 endosomal recycling in the developing excretory canal cell.

447

448

## CONCLUSION

449 This RNAi screen was successful at identifying 24 genes (17 not implicated before) needed to  
450 form a normal lumen of the long excretory canals of *C. elegans*. These genes encode  
451 transcription and translation factors, innexins and other channels, and proteins involved in  
452 trafficking, among others. While these processes have been implicated previously in canal  
453 tubulogenesis, these proteins identify new actors that could provide insights into how these  
454 cellular processes are integrated in single-cell tubulogenesis. Several other proteins have roles in  
455 sugar metabolism and redox, which are new processes to be involved in canal morphogenesis.  
456 Finally, two genes were identified as suppressors of *exc-5* mutation; determining the function of  
457 these suppressor proteins has the potential to increase understanding of the function of FGD  
458 protein function in normal development and in disease.

459

460

## ACKNOWLEDGMENTS

461 H.A. was supported in part by KU Graduate Research Funds #2301847 and #2144091.  
462 E.A.L. was supported by National Institutes of Health grants #NS0090945, NS0095682,  
463 NS0076063, and GM103638. Some strains were provided by the CGC, which is funded by the  
464 NIH Office of Research Infrastructure Programs (P40 OD010440). RNAi-refractive strain  
465 NL3321 *sid-1(pk3321)* was the gift of Lisa Timmons, U. Kansas. Some strains were created  
466 by the *C. elegans* Reverse Genetics Core Facility at the University of British Columbia, which  
467 is part of the international *C. elegans* Gene Knockout Consortium.

468

469

## AUTHOR CONTRIBUTIONS

470 M.B. and H.A. designed the research, with support from E.A.L. on strategies for RNAi  
471 treatments; H.A. and T.C. performed bacterial and nematode growth, performed RNAi  
472 treatments, and evaluation of canal phenotypes. E.A.L. supplied bacterial RNAi clones. M.B.  
473 and H.A. prepared the figures and wrote the manuscript.

474

475

## LITERATURE CITED

- 476 AL-HASHIMI, H., D. H. HALL, B. D. ACKLEY, E. A. LUNDQUIST, and M. BUECHNER, 2018  
477 Intermediate filaments EXC-2 and IFA-4 Maintain Luminal Structure of the Tubular  
478 Excretory Canals in *Caenorhabditis elegans*. *Genetics*, in press.  
479 <https://doi.org/10.1534/genetics.118.301078>
- 480 ALTUN, Z. F., B. CHEN, Z. W. WANG and D. H. HALL, 2009 High resolution map of  
481 *Caenorhabditis elegans* gap junction proteins. *Dev Dyn* **238**: 1936-1950.  
482 <https://doi.org/10.1002/dvdy.22025>
- 483 ARMENTI, S. T., E. CHAN and J. NANCE, 2014 Polarized exocyst-mediated vesicle fusion directs  
484 intracellular lumenogenesis within the *C. elegans* excretory cell. *Dev Biol* **394**: 110-121.  
485 <https://doi.org/10.1016/j.ydbio.2014.07.019>
- 486 ARMSTRONG, K. R., and H. M. CHAMBERLIN, 2010 Coordinate regulation of gene expression in  
487 the *C. elegans* excretory cell by the POU domain protein CEH-6. *Mol Genet Genomics*  
488 **283**: 73-87. <https://doi.org/10.1007/s00438-009-0497-8>
- 489 BERRY, K. L., H. E. BULOW, D. H. HALL and O. HOBERT, 2003 A *C. elegans* CLIC-like protein  
490 required for intracellular tube formation and maintenance. *Science* **302**: 2134-2137.  
491 <https://doi.org/10.1126/science.1087667>
- 492 BRENNER, S., 1974 The genetics of *Caenorhabditis elegans*. *Genetics* **77**: 71-94.
- 493 BUECHNER, M., D. H. HALL, H. BHATT and E. M. HEDGECOCK, 1999 Cystic Canal Mutants in  
494 *Caenorhabditis elegans* Are Defective in the Apical Membrane Domain of the Renal  
495 (Excretory) Cell. *Developmental Biology* **214**: 227-241.  
496 <https://doi.org/10.1006/dbio.1999.9398>
- 497 BURGLIN, T. R., and G. RUVKUN, 2001 Regulation of ectodermal and excretory function by the  
498 *C. elegans* POU homeobox gene *ceh-6*. *Development* **128**: 779-790.



- 499 CALIXTO, A., D. CHELUR, I. TOPALIDOU, X. CHEN and M. CHALFIE, 2010 Enhanced neuronal  
500 RNAi in *C. elegans* using SID-1. *Nat Methods* **7**: 554-559.  
501 <https://doi.org/10.1038/nmeth.1463>
- 502 CHANG, M., Y. HONG, J. R. BURGESS, C. P. TU and C. C. REDDY, 1987 Isozyme specificity of rat  
503 liver glutathione S-transferases in the formation of PGF<sub>2</sub> alpha and PGE<sub>2</sub> from PGH<sub>2</sub>.  
504 *Arch Biochem Biophys* **259**: 548-557.
- 505 CLIFFORD, R., M. H. LEE, S. NAYAK, M. OHMACHI, F. GIORGINI *et al.*, 2000 FOG-2, a novel F-  
506 box containing protein, associates with the GLD-1 RNA binding protein and directs male  
507 sex determination in the *C. elegans* hermaphrodite germline. *Development* **127**: 5265-  
508 5276.
- 509 CRAM, E. J., H. SHANG and J. E. SCHWARZBAUER, 2006 A systematic RNA interference screen  
510 reveals a cell migration gene network in *C. elegans*. *J Cell Sci* **119**: 4811-4818.  
511 <https://doi.org/10.1242/jcs.03274>
- 512 DELAGUE, V., A. JACQUIER, T. HAMADOUCHE, Y. POITELON, C. BAUDOT *et al.*, 2007 Mutations in  
513 FGD4 encoding the Rho GDP/GTP exchange factor FRABIN cause autosomal recessive  
514 Charcot-Marie-Tooth type 4H. *Am J Hum Genet* **81**: 1-16.  
515 <https://doi.org/10.1086/518428>
- 516 EDMONDS, M. J., and A. MORGAN, 2014 A systematic analysis of protein palmitoylation in  
517 *Caenorhabditis elegans*. *BMC Genomics* **15**: 841. [https://doi.org/10.1186/1471-2164-15-](https://doi.org/10.1186/1471-2164-15-841)  
518 841
- 519 FORMAN-RUBINSKY, R., J. D. COHEN and M. V. SUNDARAM, 2017 Lipocalins Are Required for  
520 Apical Extracellular Matrix Organization and Remodeling in *Caenorhabditis elegans*.  
521 *Genetics* **207**: 625-642. <https://doi.org/10.1534/genetics.117.300207>

- 522 FRIDOLFSSON, H. N., N. LY, M. MEYERZON and D. A. STARR, 2010 UNC-83 coordinates  
523 kinesin-1 and dynein activities at the nuclear envelope during nuclear migration. *Dev*  
524 *Biol* **338**: 237-250. <https://doi.org/10.1016/j.ydbio.2009.12.004>
- 525 FUJITA, M., D. HAWKINSON, K. V. KING, D. H. HALL, H. SAKAMOTO *et al.*, 2003 The role of the  
526 ELAV homologue EXC-7 in the development of the *Caenorhabditis elegans* excretory  
527 canals. *Dev Biol* **256**: 290-301.
- 528 GAO, J., L. ESTRADA, S. CHO, R. E. ELLIS and J. L. GORSKI, 2001 The *Caenorhabditis elegans*  
529 homolog of FGD1, the human Cdc42 GEF gene responsible for faciogenital dysplasia, is  
530 critical for excretory cell morphogenesis. *Hum Mol Genet* **10**: 3049-3062.
- 531 GILL, H. K., J. D. COHEN, J. AYALA-FIGUEROA, R. FORMAN-RUBINSKY, C. POGGIOLI *et al.*, 2016  
532 Integrity of Narrow Epithelial Tubes in the *C. elegans* Excretory System Requires a  
533 Transient Luminal Matrix. *PLoS Genet* **12**: e1006205.  
534 <https://doi.org/10.1371/journal.pgen.1006205>
- 535 GÖBEL, V., P. L. BARRETT, D. H. HALL and J. T. FLEMING, 2004 Lumen morphogenesis in *C.*  
536 *elegans* requires the membrane-cytoskeleton linker *erm-1*. *Dev Cell* **6**: 865-873.  
537 <https://doi.org/10.1016/j.devcel.2004.05.018>
- 538 GRUSSENDORF, K. A., C. J. TREZZA, A. T. SALEM, H. AL-HASHIMI, B. C. MATTINGLY *et al.*,  
539 2016 Facilitation of Endosomal Recycling by an IRG Protein Homolog Maintains Apical  
540 Tubule Structure in *Caenorhabditis elegans*. *Genetics* **203**: 1789-1806.  
541 <https://doi.org/10.1534/genetics.116.192559>
- 542 HAHN-WINDGASSEN, A., and M. R. VAN GILST, 2009 The *Caenorhabditis elegans* HNF4alpha  
543 Homolog, NHR-31, mediates excretory tube growth and function through coordinate  
544 regulation of the vacuolar ATPase. *PLoS Genet* **5**: e1000553.  
545 <https://doi.org/10.1371/journal.pgen.1000553>

- 546 HALL, D. H., 2017 Gap junctions in *C. elegans*: Their roles in behavior and development. *Dev*  
547 *Neurobiol* **77**: 587-596. <https://doi.org/10.1002/dneu.22408>
- 548 HEDGECOCK, E. M., J. G. CULOTTI, D. H. HALL and B. D. STERN, 1987 Genetics of cell and axon  
549 migrations in *Caenorhabditis elegans*. *Development* **100**: 365-382.
- 550 HENCH, J., J. HENRIKSSON, A. M. ABOU-ZIED, M. LUPPERT, J. DETHLEFSEN *et al.*, 2015 The  
551 Homeobox Genes of *Caenorhabditis elegans* and Insights into Their Spatio-Temporal  
552 Expression Dynamics during Embryogenesis. *PLoS One* **10**: e0126947. [https://doi.org/](https://doi.org/10.1371/journal.pone.0126947)  
553 [10.1371/journal.pone.0126947](https://doi.org/10.1371/journal.pone.0126947)
- 554 HORN, M., R. BAUMANN, J. A. PEREIRA, P. N. SIDIROPOULOS, C. SOMANDIN *et al.*, 2012 Myelin is  
555 dependent on the Charcot-Marie-Tooth Type 4H disease culprit protein FRABIN/FGD4  
556 in Schwann cells. *Brain* **135**: 3567-3583. <https://doi.org/10.1093/brain/aws275>
- 557 HULL, D., and L. TIMMONS, 2004 Methods for delivery of double-stranded RNA into  
558 *Caenorhabditis elegans*. *Methods Mol Biol* **265**: 23-58. [https://doi.org/10.1385/1-59259-](https://doi.org/10.1385/1-59259-775-0:023)  
559 [775-0:023](https://doi.org/10.1385/1-59259-775-0:023)
- 560 KAMATH, R. S., A. G. FRASER, Y. DONG, G. POULIN, R. DURBIN *et al.*, 2003 Systematic  
561 functional analysis of the *Caenorhabditis elegans* genome using RNAi. *Nature* **421**: 231-  
562 237. <https://doi.org/10.1038/nature01278>
- 563 KHAN, L. A., H. ZHANG, N. ABRAHAM, L. SUN, J. T. FLEMING *et al.*, 2013 Intracellular lumen  
564 extension requires ERM-1-dependent apical membrane expansion and AQP-8-mediated  
565 flux. *Nat Cell Biol* **15**: 143-156. <https://doi.org/10.1038/ncb2656>
- 566 KIM, E., L. SUN, C. V. GABEL and C. FANG-YEN, 2013 Long-term imaging of *Caenorhabditis*  
567 *elegans* using nanoparticle-mediated immobilization. *PLoS One* **8**: e53419.  
568 <https://doi.org/10.1371/journal.pone.0053419>
- 569

- 570 KIPREOS, E. T., and M. PAGANO, 2000 The F-box protein family. *Genome Biol* **1**:  
571 REVIEWS3002. <https://doi.org/10.1186/gb-2000-1-5-reviews3002>
- 572 KOLOTUEV, I., V. HYENNE, Y. SCHWAB, D. RODRIGUEZ and M. LABOUESSE, 2013 A pathway for  
573 unicellular tube extension depending on the lymphatic vessel determinant Prox1 and on  
574 osmoregulation. *Nat Cell Biol* **15**: 157-168. <https://doi.org/10.1038/ncb2662>
- 575 LANT, B., B. YU, M. GOUDREULT, D. HOLMYARD, J. D. KNIGHT *et al.*, 2015 CCM-3/STRIPAK  
576 promotes seamless tube extension through endocytic recycling. *Nat Commun* **6**: 6449.  
577 <https://doi.org/10.1038/ncomms7449>
- 578 LIEGEOIS, S., A. BENEDETTO, J. M. GARNIER, Y. SCHWAB and M. LABOUESSE, 2006 The V0-  
579 ATPase mediates apical secretion of exosomes containing Hedgehog-related proteins in  
580 *Caenorhabditis elegans*. *J Cell Biol* **173**: 949-961. <https://doi.org/10.1083/jcb.200511072>
- 581 LIU, J. L., D. DESJARDINS, R. BRANICKY, L. B. AGELLON and S. HEKIMI, 2012 Mitochondrial  
582 oxidative stress alters a pathway in *Caenorhabditis elegans* strongly resembling that of  
583 bile acid biosynthesis and secretion in vertebrates. *PLoS Genet* **8**: e1002553.  
584 <https://doi.org/10.1371/journal.pgen.1002553>
- 585 LUBARSKY, B., and M. A. KRASNOW, 2003 Tube morphogenesis: making and shaping biological  
586 tubes. *Cell* **112**: 19-28. [https://doi.org/10.1016/S0092-8674\(02\)01283-7](https://doi.org/10.1016/S0092-8674(02)01283-7)
- 587 MAH, A. K., K. R. ARMSTRONG, D. S. CHEW, J. S. CHU, D. K. TU *et al.*, 2007 Transcriptional  
588 regulation of AQP-8, a *Caenorhabditis elegans* aquaporin exclusively expressed in the  
589 excretory system, by the POU homeobox transcription factor CEH-6. *J Biol Chem* **282**:  
590 28074-28086. <https://doi.org/10.1074/jbc.M70330520>
- 591 MANCUSO, V. P., J. M. PARRY, L. STORER, C. POGGIOLI, K. C. NGUYEN *et al.*, 2012 Extracellular  
592 leucine-rich repeat proteins are required to organize the apical extracellular matrix and  
593 maintain epithelial junction integrity in *C. elegans*. *Development* **139**: 979-990.  
594 <https://doi.org/10.1242/dev.075135>

- 595 MATTINGLY, B. C., and M. BUECHNER, 2011 The FGD homologue EXC-5 regulates apical  
596 trafficking in *C. elegans* tubules. *Dev Biol* **359**: 59-72.  
597 <https://doi.org/10.1016/j.ydbio.2011.08.011>
- 598 MCSHEA, M. A., K. L. SCHMIDT, M. L. DUBUKE, C. E. BALDIGA, M. E. SULLENDER *et al.*, 2013  
599 Abelson interactor-1 (ABI-1) interacts with MRL adaptor protein MIG-10 and is required  
600 in guided cell migrations and process outgrowth in *C. elegans*. *Dev Biol* **373**: 1-13.  
601 <https://doi.org/10.1016/j.ydbio.2012.09.017>
- 602 MOON, S., Y. W. LEE, W. T. KIM and W. LEE, 2014 Solution structure of CEH-37 homeodomain  
603 of the nematode *Caenorhabditis elegans*. *Biochem Biophys Res Commun* **443**: 370-375.  
604 <https://doi.org/10.1016/j.bbrc.2013.11.13>
- 605 MORA-LORCA, J. A., B. SAENZ-NARCISO, C. J. GAFFNEY, F. J. NARANJO-GALINDO, J. R.  
606 PEDRAJAS *et al.*, 2016 Glutathione reductase *gsr-1* is an essential gene required for  
607 *Caenorhabditis elegans* early embryonic development. *Free Radic Biol Med* **96**: 446-461.  
608 <https://doi.org/10.1016/j.freeradbiomed.2016.04.017>
- 609 NELSON, F. K., P. S. ALBERT and D. S. RIDDLE, 1983 Fine structure of the *Caenorhabditis*  
610 *elegans* secretory-excretory system. *Journal of Ultrastructural Research* **82**: 156-171.
- 611 NIGAM, S. K., 2018 The SLC22 Transporter Family: A Paradigm for the Impact of Drug  
612 Transporters on Metabolic Pathways, Signaling, and Disease. *Annu Rev Pharmacol*  
613 *Toxicol* **58**: 663-687. <https://doi.org/10.1146/annurev-pharmtox-010617-052713>
- 614 OHNO, Y., A. KASHIO, R. OGATA, A. ISHITOMI, Y. YAMAZAKI *et al.*, 2012 Analysis of substrate  
615 specificity of human DHHC protein acyltransferases using a yeast expression system.  
616 *Mol Biol Cell* **23**: 4543-4551. <https://doi.org/10.1091/mbc.E12-05-0336>
- 617 OKA, T., T. TOYOMURA, K. HONJO, Y. WADA and M. FUTAI, 2001 Four subunit a isoforms of  
618 *Caenorhabditis elegans* vacuolar H<sup>+</sup>-ATPase. Cell-specific expression during  
619 development. *J Biol Chem* **276**: 33079-33085. <https://doi.org/10.1074/jbc.M101652200>

- 620 PAL, S., B. LANT, B. YU, R. TIAN, J. TONG *et al.*, 2017 CCM-3 Promotes *C. elegans* Germline  
621 Development by Regulating Vesicle Trafficking Cytokinesis and Polarity. *Curr Biol* **27**:  
622 868-876. <https://doi.org/10.1016/j.cub.2017.02.028>
- 623 PETER, D., R. WEBER, C. KONE, M. Y. CHUNG, L. EBERTSCH *et al.*, 2015 Mex1 proteins use  
624 both canonical bipartite and novel tripartite binding modes to form eIF4E complexes that  
625 display differential sensitivity to 4E-BP regulation. *Genes Dev* **29**: 1835-1849.  
626 <https://doi.org/10.1101/gad.269068.115>
- 627 PEYMEN, K., J. WATTEYNE, L. FROONINCKX, L. SCHOOF and I. BEETS, 2014 The FMR1-like  
628 Like Peptide Family in Nematodes. *Front Endocrinol (Lausanne)* **5**: 90.  
629 <https://doi.org/10.3389/fendo.2014.00090>
- 630 PHORNPHUTKUL, C., Y. ANIKSTER, M. HUIZING, P. BRAUN, C. BRODIE *et al.*, 2001 The promoter  
631 of a lysosomal membrane transporter gene, CTNS, binds Sp-1, shares sequences with the  
632 promoter of an adjacent gene, CARKL, and causes cystinosis if mutated in a critical  
633 region. *Am J Hum Genet* **69**: 712-721. <https://doi.org/10.1086/323484>
- 634 PRAITIS, V., E. CICCONE and J. AUSTIN, 2005 SMA-1 spectrin has essential roles in epithelial cell  
635 sheet morphogenesis in *C. elegans*. *Dev Biol* **283**: 157-170.  
636 <https://doi.org/10.1016/j.ydbio.2005.04.002>
- 637 QIN, L., X. LIU, Q. SUN, Z. FAN, D. XIA *et al.*, 2012 Sialin (SLC17A5) functions as a nitrate  
638 transporter in the plasma membrane. *Proc Natl Acad Sci U S A* **109**: 13434-13439.  
639 <https://doi.org/10.1073/pnas.1116633109>
- 640 SANGHAVI, P., G. LIU, A. R. VEERANAN-KARMEGAM, C. NAVARRO and G. B. GONSALVEZ, 2016  
641 Multiple Roles for Egalitarian in Polarization of the *Drosophila* Egg Chamber. *Genetics*  
642 **203**: 415-432. <https://doi.org/10.1534/genetics.115.184622>

- 643 SEVERSON, A. F., D. L. BAILLIE and B. BOWERMAN, 2002 A Formin Homology protein and a  
644 profilin are required for cytokinesis and Arp2/3-independent assembly of cortical  
645 microfilaments in *C. elegans*. *Curr Biol* **12**: 2066-2075.
- 646 SHAYE, D. D., and I. GREENWALD, 2015 The Disease-Associated Formin INF2/EXC-6 Organizes  
647 Lumen and Cell Outgrowth during Tubulogenesis by Regulating F-Actin and  
648 Microtubule Cytoskeletons. *Dev Cell* **32**: 743-755.  
649 <https://doi.org/10.1016/j.devcel.2015.01.009>
- 650 SHAYE, D. D., and I. GREENWALD, 2016 A network of conserved formins, regulated by the  
651 guanine exchange factor EXC-5 and the GTPase CDC-42, modulates tubulogenesis in  
652 vivo. *Development* **143**: 4173-4181. <https://doi.org/10.1242/dev.141861>
- 653 SIGURBJÖRNSDÓTTIR, S., R. MATHEW and M. LEPTIN, 2014 Molecular mechanisms of de novo  
654 lumen formation. *Nat Rev Mol Cell Biol* **15**: 665-676. <https://doi.org/10.1038/nrm3871>
- 655 SIMMER, F., M. TIJSTERMAN, S. PARRISH, S. P. KOUSHIKA, M. L. NONET *et al.*, 2002 Loss of the  
656 putative RNA-directed RNA polymerase RRF-3 makes *C. elegans* hypersensitive to  
657 RNAi. *Curr Biol* **12**: 1317-1319.
- 658 SPENCER, W. C., G. ZELLER, J. D. WATSON, S. R. HENZ, K. L. WATKINS *et al.*, 2011 A spatial  
659 and temporal map of *C. elegans* gene expression. *Genome Res* **21**: 325-341.  
660 <https://doi.org/10.1101/gr.114595.110>
- 661 STRAUSS, O., C. MULLER, N. REICHHART, E. R. TAMM and N. M. GOMEZ, 2014 The role of  
662 bestrophin-1 in intracellular Ca(2+) signaling. *Adv Exp Med Biol* **801**: 113-119.  
663 [https://doi.org/10.1007/978-1-4614-3209-8\\_15](https://doi.org/10.1007/978-1-4614-3209-8_15)
- 664 SULSTON, J. E., and J. HODGKIN, 1988 Methods, pp. 587-606 in *The Nematode Caenorhabditis*  
665 *elegans*, edited by W. B. WOOD. Cold Spring Harbor Press, Cold Spring Harbor, New  
666 York.

- 667 SULSTON, J. E., E. SCHIERENBERG, J. G. WHITE and J. N. THOMSON, 1983 The embryonic cell  
668 lineage of the nematode *Caenorhabditis elegans*. *Dev Biol* **100**: 64-119.
- 669 SUN, Q., Y. WU, S. JONUSAITE, J. M. PLEINIS, J. M. HUMPHREYS *et al.*, 2018 Intracellular  
670 Chloride and Scaffold Protein Mo25 Cooperatively Regulate Transepithelial Ion  
671 Transport through WNK Signaling in the Malpighian Tubule. *J Am Soc Nephrol*.  
672 <https://doi.org/10.1681/asn.2017101091>
- 673 SUNDARAM, M. V., and M. BUECHNER, 2016 The *Caenorhabditis elegans* Excretory System: A  
674 Model for Tubulogenesis, Cell Fate Specification, and Plasticity. *Genetics* **203**: 35-63.  
675 <https://doi.org/10.1534/genetics.116.189357>
- 676 SUZUKI, N., M. BUECHNER, K. NISHIWAKI, D. H. HALL, H. NAKANISHI *et al.*, 2001 A putative  
677 GDP-GTP exchange factor is required for development of the excretory cell in  
678 *Caenorhabditis elegans*. *EMBO Rep* **2**: 530-535. [https://doi.org/10.1093/embo-](https://doi.org/10.1093/embo-reports/kve110)  
679 [reports/kve110](https://doi.org/10.1093/embo-reports/kve110)
- 680 TIMMONS, L., and A. FIRE, 1998 Specific interference by ingested dsRNA. *Nature* **395**: 854.  
681 <https://doi.org/10.1038/27579>
- 682 TONG, X., and M. BUECHNER, 2008 CRIP homologues maintain apical cytoskeleton to regulate  
683 tubule size in *C. elegans*. *Dev Biol* **317**: 225-233. [https://doi.org/](https://doi.org/10.1016/j.ydbio.2008.02.040)  
684 [10.1016/j.ydbio.2008.02.040](https://doi.org/10.1016/j.ydbio.2008.02.040)
- 685 WAMELINK, M. M., E. A. STRUYS, E. E. JANSEN, E. N. LEVTCHENKO, F. S. ZIJLSTRA *et al.*, 2008  
686 Sedoheptulokinase deficiency due to a 57-kb deletion in cystinosis patients causes  
687 urinary accumulation of sedoheptulose: elucidation of the CARKL gene. *Hum Mutat* **29**:  
688 532-536. <https://doi.org/10.1002/humu.20685>
- 689



690

## FIGURE LEGENDS

### 691 **Figure 1. The excretory canals and induction controls.**

692 (A) Schematic diagram of the excretory canals extending over the full length of the worm with  
693 basal membrane (black) and apical membrane (red) surrounding a narrow lumen (white).  
694 Numbers 0-4 represent numerical assignments used to assess canal length. (B) DIC image of  
695 section of posterior excretory canal of wild-type worm (N2); canal is narrow with uniform  
696 diameter. Bar, 10 $\mu$ m. (C) Magnified DIC image of excretory canal of wild-type worm (N2).  
697 Lines indicate boundaries of canal lumen/apical surface (red) and cytoplasmic/basal surface  
698 (green). (D-F) Controls to ensure strong induction of dsRNA synthesis for RNAi screen, in *rrf-*  
699 *3(pk1426)* animals expressing GFP in the canals: (D) Knockdown of cuticle collagen gene *dpy-*  
700 *11*. Boxed image: Magnification of single worm. Bar = 100 $\mu$ m. (E) DIC and (E') GFP image of  
701 *erm-1* knockdown. Bar, 10 $\mu$ m. (F) DIC and (F') GFP image of *exc-1* knockdown. Bar, 10 $\mu$ m.

### 702 **Figure 2. RNAi knockdowns causing formation of fluid-filled cysts or swollen lumen.**

703 (A-F) DIC images and (A'-F') GFP fluorescence of representative animals exhibiting RNAi  
704 knockdown phenotypes: (A) *ceh-6*; (B) *T25C8.1 (exc-10)*; (C) *egal-1*; (D) *mop-25.2*; (E)  
705 *F41E7.1 (exc-11)*; (F) *T05D4.3 (exc-12)*. Arrows: Medium and large fluid-filled cysts. All  
706 bars, 10  $\mu$ m.

707

### 708 **Figure 3. RNAi knockdowns causing periodic cytoplasmic swellings.**

709 GFP fluorescence images of swellings (“beads”) along length of canals. Boxed insets of marked  
710 areas are magnified to show width of lumen in regions within and between beads: (A) *inx-12*;  
711 (B) *inx-13*; (C) *ceh-37*; (D) *dhhc-2*; (E) *mxt-1*. Inset in (D) is of region posterior to end of

712 lumen, so lumen is not visible. Note visible vesicles in cytoplasmic beads in (D). All bars, 10  
713  $\mu\text{m}$ .

714 **Figure 4. RNAi knockdowns causing swelling at end of lumen.**

715 GFP fluorescence images of swollen canals at termination of lumen caused by RNAi knockdown  
716 of genes: (A) *gst-28*; (B) *gsr-1*; (C) *ceh-37*; (D) *fbxa-183*; (E) *T19D12.9 (exc-13)*; (F) *C09F12.3*  
717 (*exc-18*); (G) *best-3*; (H) *mop-235.2*; (I) *gck-3*. All images show regions of convoluted canals.  
718 Some areas in panels B, E, F, and I show additional areas that appear as individual separated  
719 small cysts or large vesicles. Arrows: Cytoplasmic tail continuing past termination of lumen in  
720 panels B, C, G, and I. All bars, 10  $\mu\text{m}$ .

721

722 **Figure 5. RNAi knockdowns causing irregular basal membrane along canal length.**

723 (A) DIC and (A') GFP fluorescence images of distal tip of canal of representative animal  
724 knocked down for *K11D12.9 (exc-14)*. Boxed areas are enlarged to right. Thin lumen indicated  
725 by black arrowheads is surrounded by area of bright GFP fluorescence. Distorted cytoplasmic  
726 shape is filled with large number of vesicles (red arrows). (B-F) GFP fluorescence of  
727 representative animals knocked down for genes: (B) *fbxa-183*; (C) *H09G03.1(exc-16)*; (D)  
728 *T08H10.1 (exc-15)*; (E) *C03G6.5 (exc-17)*; (F) *cyk-1*. Boxed areas enlarged below each panel  
729 show areas along the canals where cytoplasm surface is swollen with vesicles, and basal surface  
730 is irregular and noticeably wider than in wild-type animals. Arrows show enlarged vesicles or  
731 cysts. Bars, 10  $\mu\text{m}$ .

732

733

734

735 **Figure 6. Knockdown of *vha-5* leads to a wide range of phenotypes.**

736 (A-D) GFP fluorescence of four different worms exhibiting a range of excretory canal  
737 phenotypic severity in response to *vha-5* knockdown. For each animal, the boxed area is  
738 enlarged below). (A) Periodic cytoplasmic swellings along lumen of canal. Arrows show visible  
739 lumen of normal diameter. (B) Small septate cysts in the lumen of the canal, surrounded by area  
740 of bright GFP fluorescence, and somewhat irregular diameter cytoplasm. (C) Lumen with  
741 septate cysts similar to 4B and surrounded by cytoplasm of more irregular diameter containing  
742 large cysts/vesicles. (D) Wider-diameter lumen with larger cysts, surrounded by cytoplasm filled  
743 with vesicles in a wide range of sizes. Bar, 10 $\mu$ m.

744

745 **Figure 7. Knockdown of some *exc* genes causes tailspike defect.**

746 DIC images of the narrow tail spike of adult hermaphrodite wild-type animal (A) and of adult  
747 mutants exhibiting RNAi knockdown for genes: (B) *F41E7.1 (exc-11)*; (d) *K11D12.9 (exc-14)*;  
748 (D) *egal-1*; (E) *mop-25.2*; (F) *inx-12*. Bars, 50 $\mu$ m.

749

750 **Figure 8. Knockdown of two genes suppresses the Exc-5 phenotype.**

751 (A-C) GFP fluorescence of canals in BK545 (null *exc-5(rh232)*) mutants with RNAi-sensitized  
752 background and GFP expressed in canal cytoplasm (A) and of BK545 animals showing strong  
753 suppression when knocked down for (B) *F12A10.7 (suex-1)*, or (C) *C53B4.1 (suex-2)*. Exc-5  
754 phenotype includes very short normal-diameter canals terminating in large cysts. Red arrows  
755 indicate termination of canals. Green arrows indicate areas of slight swelling of Suex canal  
756 lumen in both knockdowns. Bars, 50  $\mu$ m. (D) Measurement of effect of *suex* suppression via

757 feeding RNAi on canal length. Canals from *exc-5* mutant and mutants with *suex* knockdown  
758 were measured according to scale in Fig. 1A. Average canal length: *exc-5(rh232)*: 1.4, *exc-*  
759 *5(rh232)*; *suex-1(RNAi)*: 2.3, *exc-5(rh232)*; *suex-2(RNAi)*: 2.3. N=207 for each genotype.  
760 Analysis via 3x2 Fisher's 3x2 Exact Test (see Materials and Methods) show differences from  
761 wild-type canal length that are highly significant: P of  $9.0 \times 10^{-17}$  for *suex-1*,  $1.7 \times 10^{-13}$  for *suex-2*.  
762

763 **Table 1.** List of strains used in this study, with genotype descriptions.

| STRAIN | GENOTYPE                                                                                    | DESCRIPTION                                                                | REFERENCE                     |
|--------|---------------------------------------------------------------------------------------------|----------------------------------------------------------------------------|-------------------------------|
| BK36   | <i>unc-119(ed3)</i> III; <i>qpIs11</i> [ <i>unc-119</i> ; <i>P<sub>vha-1</sub>::gfp</i> ] I | N2 with integrated GFP marker expressed in excretory canal cytoplasm       | (MATTINGLY AND BUECHNER 2011) |
| BK540  | <i>rrf-3(pk1426)</i> II; <i>qpIs11</i> [ <i>unc-119</i> ; <i>P<sub>vha-1</sub>::gfp</i> ] I | RNAi-sensitized strain expressing GFP in canals                            | This study                    |
| BK541  | <i>sid-1(pk3321)</i> II; <i>qpIs11</i> [ <i>unc-119</i> ; <i>P<sub>vha-1</sub>::gfp</i> ] I | Systemic RNAi-impaired strain expressing GFP in canals                     | This study                    |
| BK542  | <i>exc-2(rh90)</i> X; <i>qpIs11</i> [ <i>unc-119</i> ; <i>P<sub>vha-1</sub>::gfp</i> ] I    | <i>exc-2(rh90)</i> expressing GFP in canals                                | This study                    |
| BK543  | <i>exc-3(rh207)</i> X; <i>qpIs11</i> [ <i>unc-119</i> ; <i>P<sub>vha-1</sub>::gfp</i> ] I   | <i>exc-3(rh207)</i> expressing GFP in canals                               | This study                    |
| BK544  | <i>exc-4(rh133)</i> <i>qpIs11</i> [ <i>unc-119</i> ; <i>P<sub>vha-1</sub>::gfp</i> ] I      | <i>exc-4(rh133)</i> expressing GFP in canals                               | This study                    |
| BK545  | <i>exc-5(rh232)</i> IV; <i>qpIs11</i> [ <i>unc-119</i> ; <i>P<sub>vha-1</sub>::gfp</i> ] I  | <i>exc-5(rh232)</i> expressing GFP in canals                               | This study                    |
| BK546  | <i>exc-7(rh252)</i> II; <i>qpIs11</i> [ <i>unc-119</i> ; <i>P<sub>vha-1</sub>::gfp</i> ] I  | <i>exc-7(rh252)</i> expressing GFP in canals                               | This study                    |
| BK547  | BK540; <i>exc-2(rh90)</i> X                                                                 | <i>exc-2(rh90)</i> expressing GFP in canals in RNAi-sensitized background  | This study                    |
| BK548  | BK540; <i>exc-3(rh207)</i> X                                                                | <i>exc-3(rh207)</i> expressing GFP in canals in RNAi-sensitized background | This study                    |
| BK549  | BK540; <i>exc-4(rh133)</i> I                                                                | <i>exc-4(rh133)</i> expressing GFP in canals in RNAi-sensitized background | This study                    |
| BK550  | BK540; <i>exc-5(rh232)</i> IV                                                               | <i>exc-5(rh232)</i> expressing GFP in canals in RNAi-sensitized background | This study                    |

764

765

766

767 **Table 2.** Genes tested exhibiting excretory canal defects via RNAi feeding \*\*\*. Genes previously found to have effects on excretory  
768 canal function or development are marked with an asterisk.

| Gene                                                    | Clone     | Protein Class | Short Description of Known or Inferred Protein Function       | Canal RNAi Phenotype                                              | # canals examined | % mutant canals | Ave. mutant canal length |
|---------------------------------------------------------|-----------|---------------|---------------------------------------------------------------|-------------------------------------------------------------------|-------------------|-----------------|--------------------------|
| <u>Transcriptional and post-transcriptional factors</u> |           |               |                                                               |                                                                   |                   |                 |                          |
| <i>ceh-6*</i>                                           | K02B12.1  |               | homeobox transcription factor                                 | large fluid-filled cysts                                          | Control           |                 |                          |
| <i>ceh-37*</i>                                          | C37E2.5   |               | Otx homeobox transcription factor                             | periodic cytoplasmic beads                                        | 40                | 30%             | 3.3                      |
| <i>fbxa-183</i>                                         | F44E7.6   |               | F-box protein, possible effects on RNA translation regulation | swollen tip with vesicles                                         | 125               | 66%             | 3.1                      |
| <i>mxt-1</i>                                            | Y18D10A.8 |               |                                                               | cytoplasmic beads with vesicles                                   | 59                | 93%             | 2.6                      |
| <u>Cytoskeletal proteins and regulators</u>             |           |               |                                                               |                                                                   |                   |                 |                          |
| <i>egal-1</i>                                           | C10G6.1   |               | Egalitarian exonuclease, regulates dynein                     | medium-sized fluid-filled cysts                                   | 40                | 100%            | 1.1                      |
| <i>cyk-1*</i>                                           | F11H8.4   |               | <i>Diaphanous</i> formin                                      | vesicles along swollen cytoplasm                                  | 77                | 77%             | 3.1                      |
| <u>Transporters, channels, and receptors</u>            |           |               |                                                               |                                                                   |                   |                 |                          |
| <i>inx-12*</i>                                          | ZK770.3   |               | innexin gap junction protein                                  | periodic cytoplasmic beads                                        | 46                | 96%             | 2.7                      |
| <i>inx-13*</i>                                          | Y8G1A.2   |               | innexin gap junction protein                                  | periodic cytoplasmic beads                                        | 50                | 80%             | 2.8                      |
| <i>vha-5*</i>                                           | F35H10.4  |               | vacuolar ATPase component                                     | beads, vesicles, swollen cytoplasm                                | 78                | 59%             | 2.5                      |
| <i>best-3</i>                                           | C01B12.3  |               | bestrophin chloride channel                                   | Swollen luminal tip                                               | 36                | 28%             | 3.4                      |
| <i>exc-11</i>                                           | F41E7.1   |               | Na <sup>+</sup> /H <sup>+</sup> solute carrier (SLC9 family)  | medium-sized fluid-filled cysts                                   | 34                | 97%             | 1.7                      |
| <i>exc-13</i>                                           | T19D12.9  |               | sialic acid solute carrier (SLC17 family)                     | swollen tip, vesicles, convolutions                               | 23                | 22%             | 3.3                      |
| <i>exc-18</i>                                           | C09F12.3  |               | Nematode 7tm GPCR                                             | vesicles along swollen cytoplasm                                  | 40                | 13%             | 3.1                      |
| <u>Vesicle movement regulators</u>                      |           |               |                                                               |                                                                   |                   |                 |                          |
| <i>gck-3*</i>                                           | Y59A8B.23 |               | germinal center kinase protein                                | swollen tip, vesicles, convolutions                               | 76                | 57%             | 3.5                      |
| <i>mop-25.2</i>                                         | Y53C12A.4 |               | scaffolding for endocytic recycling                           | medium-sized fluid-filled cysts, vesicles along swollen cytoplasm | 20                | 100%            | 1.1                      |
| <u>Enzymatic activities</u>                             |           |               |                                                               |                                                                   |                   |                 |                          |
| <i>dhhc-2</i>                                           | Y47H9C.2  |               | Zn-finger, palmitoyltransferase                               | cytoplasmic beads with vesicles                                   | 57                | 21%             | 3.5                      |
| <i>gsr-1</i>                                            | C46F11.2  |               | glutathione reductase                                         | swollen tip, vesicles, convolutions                               | 73                | 5%              | 3.4                      |

|                                             |           |                                                    |                                      |     |      |     |
|---------------------------------------------|-----------|----------------------------------------------------|--------------------------------------|-----|------|-----|
| <i>gst-28</i>                               | Y53F4B.31 | glutathione-S-transferase, prostaglandin isomerase | swollen tip with vesicles            | 26  | 27%  | 3.4 |
| <i>exc-10</i>                               | T25C8.1   | sedoheptulose kinase                               | large fluid-filled cysts             | 63  | 68%  | 3.3 |
| <i>exc-14</i>                               | K11D12.9  | RING finger, possible E3 ubiquitin ligase          | vesicles along swollen cytoplasm     | 36  | 100% | 1.4 |
| <i>exc-15</i>                               | T08H10.1  | aldo-keto reductase                                | vesicles along swollen cytoplasm     | 27  | 15%  | 3.4 |
| <u>Unknown function</u>                     |           |                                                    |                                      |     |      |     |
| <i>exc-12</i>                               | T05D4.3   | Nematode-only transmembrane protein                | medium-sized fluid-filled cysts      | 53  | 79%  | 2.6 |
| <i>exc-16</i>                               | H09G03.1  | <i>Caenorhabditis</i> -only protein                | vesicles along swollen cytoplasm     | 134 | 7%   | 3.3 |
| <i>exc-17</i>                               | C03G6.5   | Nematode conserved-domain protein                  | vesicles along swollen cytoplasm     | 54  | 20%  | 3.5 |
| <u>Suppressors of <i>exc-5</i> mutation</u> |           |                                                    |                                      |     |      |     |
| <i>suex-1</i>                               | F12A10.7  | unknown <i>Caenorhabditis</i> protein              | suppresses <i>exc-5</i> mutant cysts |     |      |     |
| <i>suex-2</i>                               | C53B4.1   | solute carrier (SLC22 family)                      | suppresses <i>exc-5</i> mutant cysts |     |      |     |

769

Fig. 1

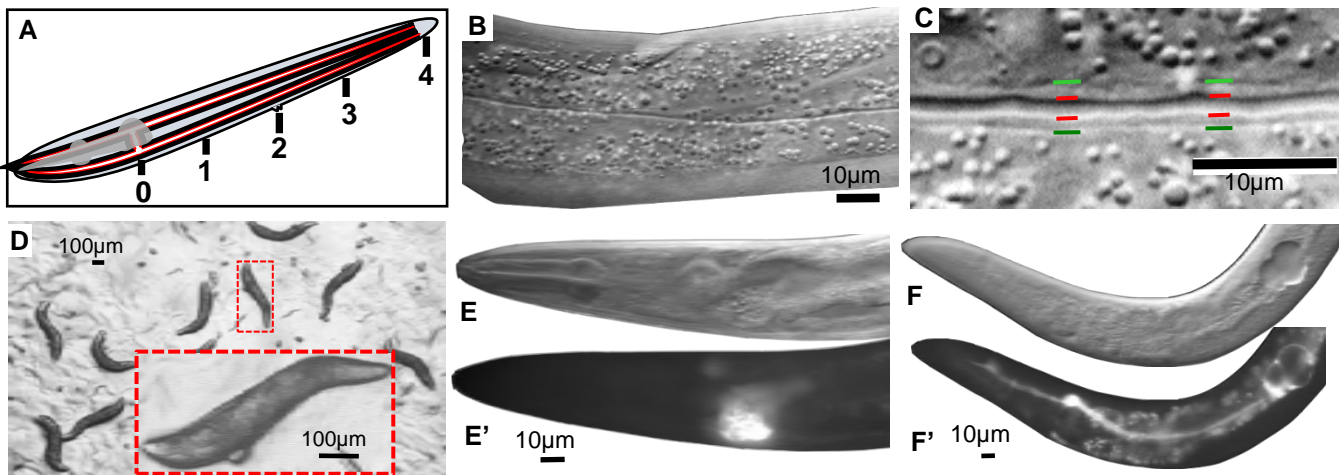



**Fig. 2**

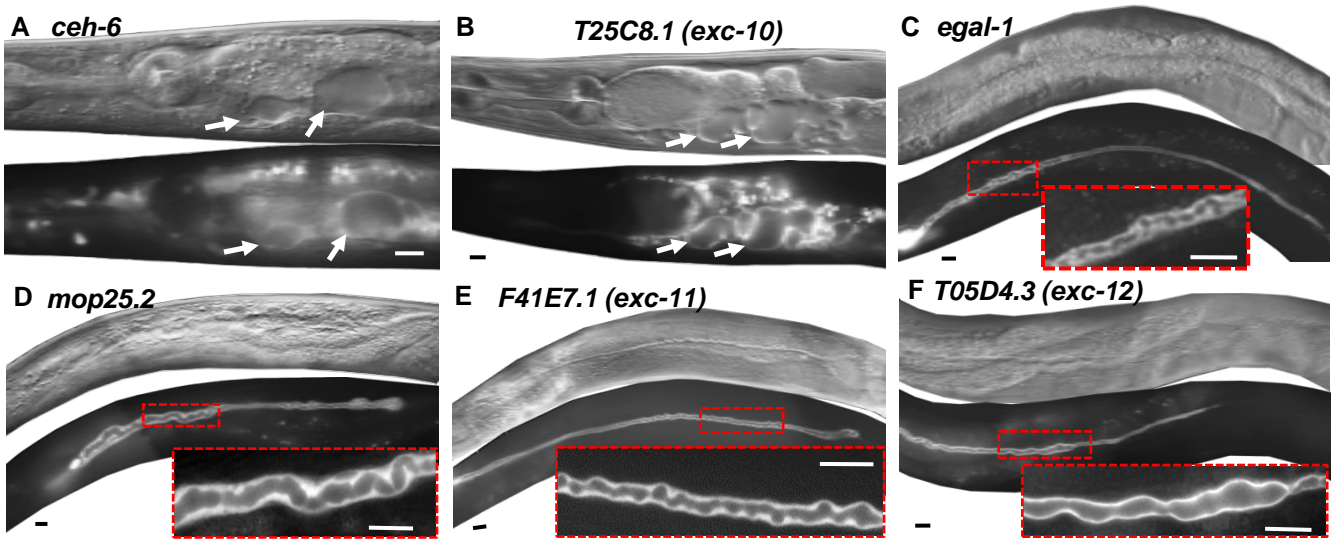

Fig. 3

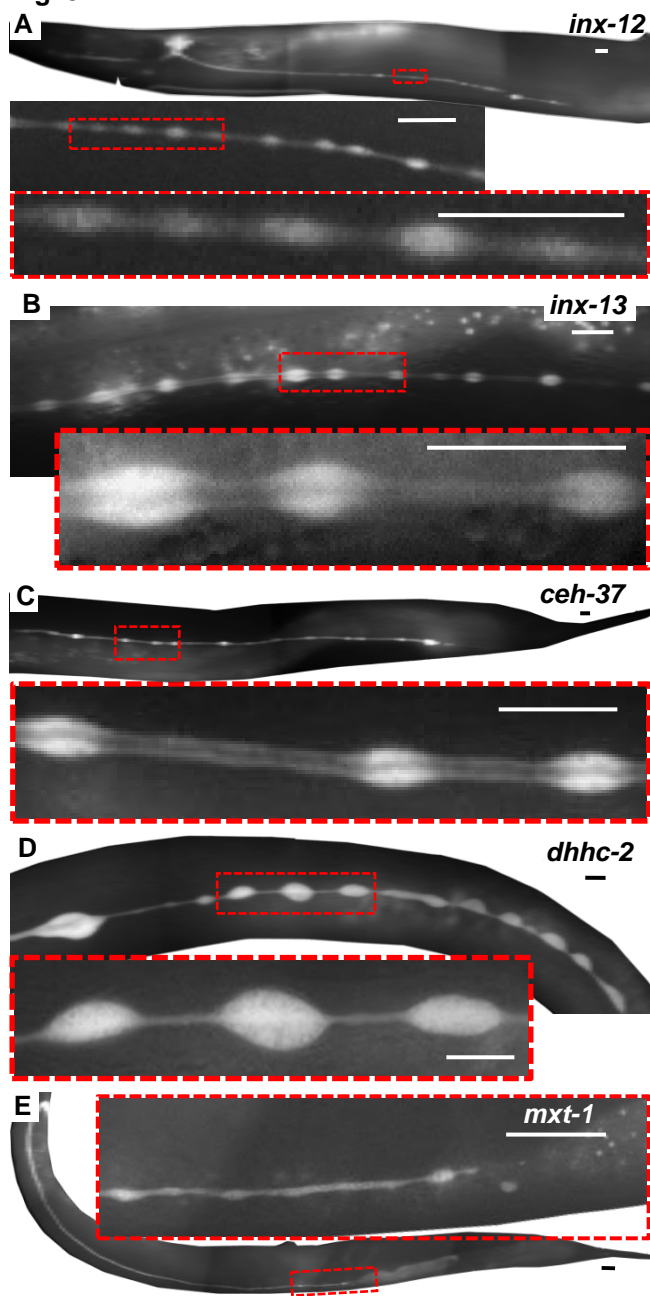

**Fig. 4**

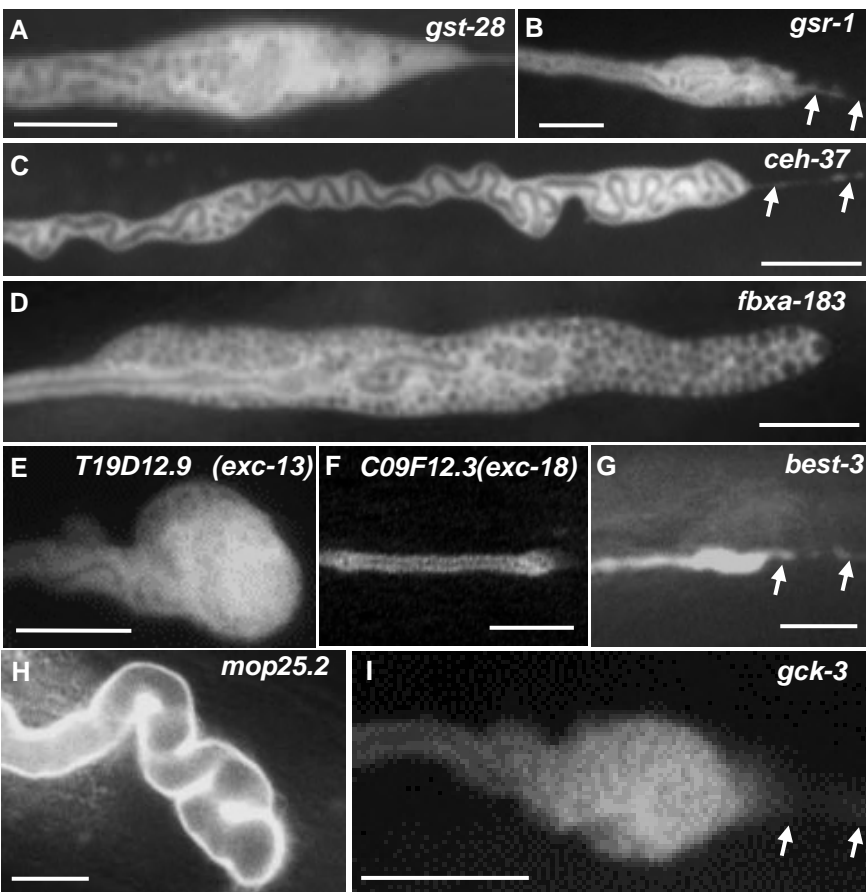

**Fig. 5**

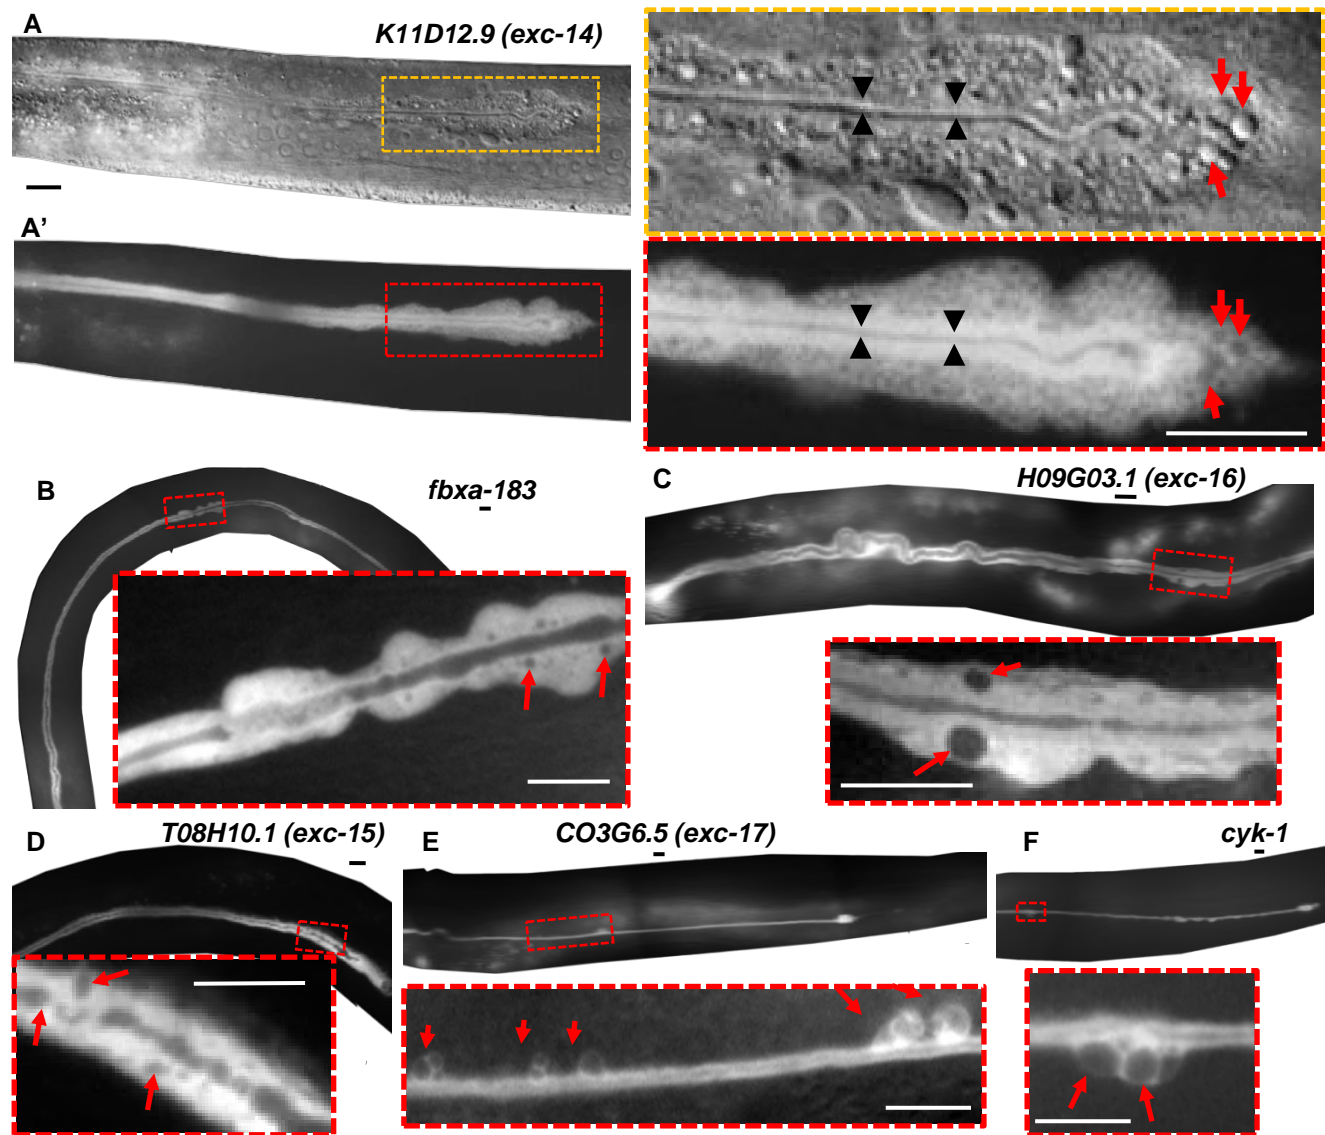

Fig. 6

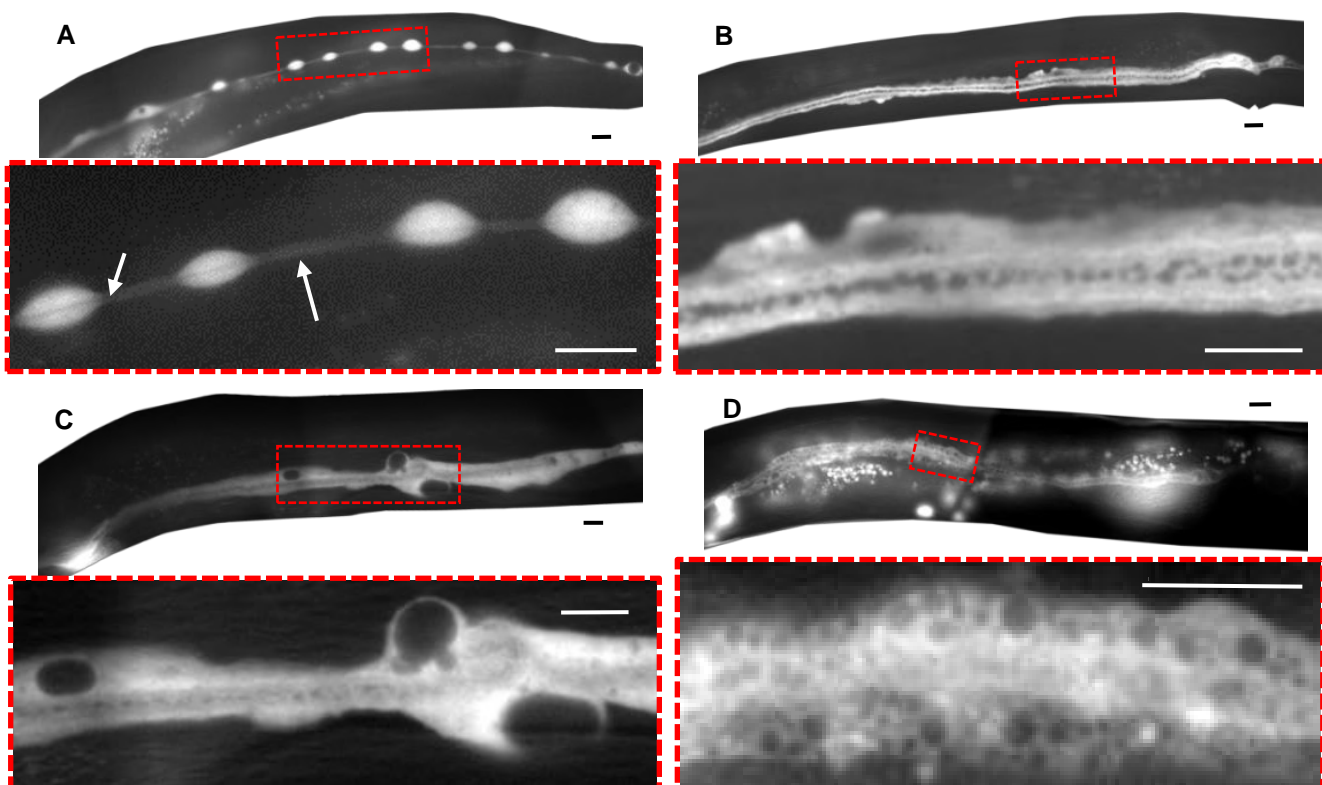

**Fig. 7**

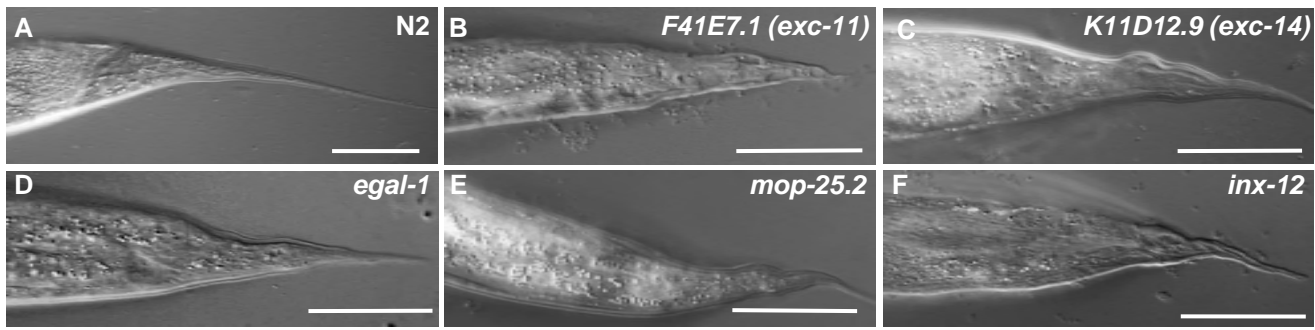

Fig. 8

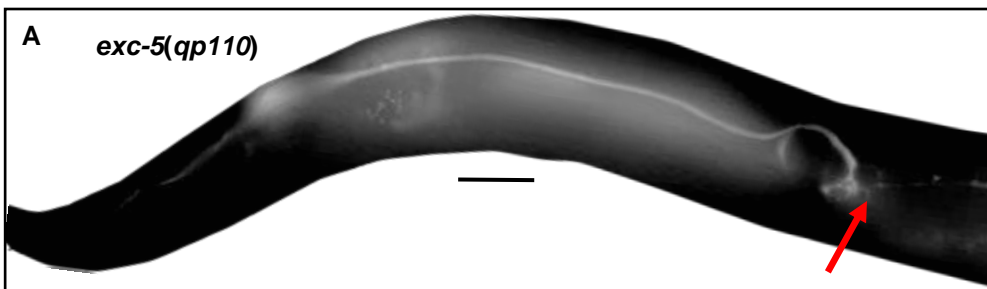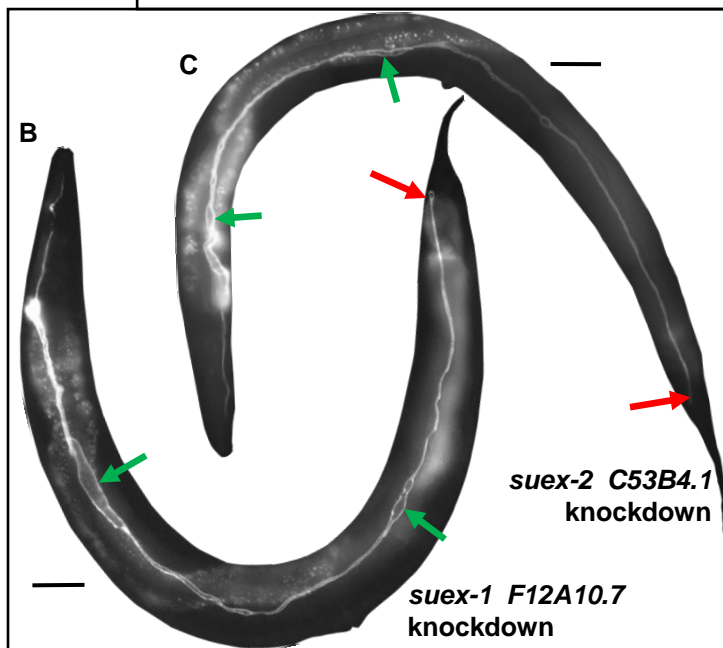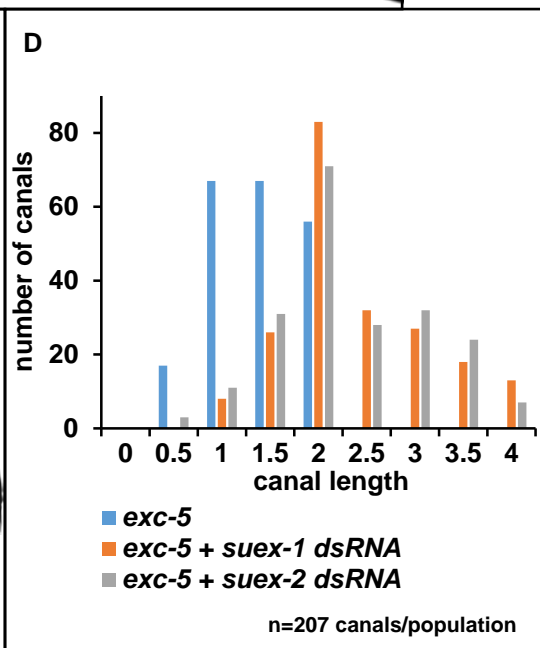

Source: http://biorxiv.org/content/10.1101/359653v1.full.pdf
